# Supplementary material for: Expression of Aspergillus nidulans phy Gene in Nicotiana benthamiana Produces Active Phytase with Broad Specificities
Source: Int J Mol Sci. 2014 Sep 3;15(9):15571–91. doi: 10.3390/ijms150915571 (PMC4200759; doi:10.3390/ijms150915571)

## Supplementary Information

**Table S1.** Daily body weight change of SD rats after oral administration of rPhy-P for 7 days.

|       | Dose (U/ kg)                |                              |                             |                              |
|-------|-----------------------------|------------------------------|-----------------------------|------------------------------|
|       | 0                           | 500                          | 1000                        | 1500                         |
| Day 0 | 167.33 ± 3.055 <sup>a</sup> | 154.67 ± 18.148 <sup>a</sup> | 166.00 ± 5.292 <sup>a</sup> | 153.33 ± 17.243 <sup>a</sup> |
| Day 1 | 171.33 ± 2.517 <sup>b</sup> | 157.33 ± 17.673 <sup>b</sup> | 171.00 ± 5.568 <sup>b</sup> | 161.67 ± 17.559 <sup>b</sup> |
| Day 2 | 177.33 ± 1.155 <sup>c</sup> | 162.67 ± 16.653 <sup>c</sup> | 180.00 ± 7.211 <sup>c</sup> | 166.67 ± 17.088 <sup>c</sup> |
| Day 3 | 179.33 ± 2.517 <sup>d</sup> | 166.00 ± 18.028 <sup>d</sup> | 181.67 ± 9.238 <sup>d</sup> | 170.33 ± 18.230 <sup>d</sup> |
| Day 4 | 186.33 ± 5.508 <sup>e</sup> | 171.33 ± 19.425 <sup>e</sup> | 186.00 ± 8.718 <sup>e</sup> | 178.67 ± 18.903 <sup>e</sup> |
| Day 5 | 180.67 ± 5.774 <sup>f</sup> | 167.33 ± 19.425 <sup>f</sup> | 180.00 ± 6.000 <sup>f</sup> | 170.67 ± 20.817 <sup>f</sup> |
| Day 6 | 178.67 ± 7.572 <sup>g</sup> | 166.67 ± 18.037 <sup>g</sup> | 178.00 ± 8.718 <sup>g</sup> | 169.33 ± 16.653 <sup>g</sup> |
| Day 7 | 180.67 ± 2.517 <sup>h</sup> | 169.67 ± 18.230 <sup>h</sup> | 183.33 ± 8.145 <sup>h</sup> | 172.33 ± 15.948 <sup>h</sup> |

No significance observed between normal and treated in any days. <sup>a-h</sup> showing no significant difference in days 0, 1, 2, 3, 4, 5, 6, 7, respectively.

**Table S2.** Organ weights of rats after oral administration of rPhy-P for 7 days.

| Organs |        | Dose (U/ kg) |              |              |              |
|--------|--------|--------------|--------------|--------------|--------------|
|        |        | 0 U          | 500 U        | 1000 U       | 1500 U       |
|        | Heart  | 0.34 ± 0.014 | 0.37 ± 0.269 | 0.31 ± 0.386 | 0.35 ± 0.016 |
|        | Liver  | 3.47 ± 0.164 | 3.36 ± 0.155 | 3.35 ± 0.540 | 3.57 ± 0.563 |
|        | Spleen | 0.24 ± 0.028 | 0.25 ± 0.017 | 0.25 ± 0.022 | 0.27 ± 0.051 |
|        | Brain  | 1.00 ± 0.056 | 1.04 ± 0.138 | 1.03 ± 0.113 | 1.04 ± 0.172 |
|        | Lung   | 0.49 ± 0.032 | 0.50 ± 0.033 | 0.53 ± 0.017 | 0.52 ± 0.060 |
| Kidney | Left   | 0.39 ± 0.003 | 0.36 ± 0.037 | 0.38 ± 0.018 | 0.40 ± 0.010 |
|        | right  | 0.37 ± 0.005 | 0.38 ± 0.054 | 0.39 ± 0.014 | 0.41 ± 0.034 |

**Table S3.** Incidence of mortality and clinical signs after 7 days oral administration of rPhy-P into rats.

| Dose (U/kg) | Mortality        | Clinical Signs |                |                                 |             |                     |             |             |
|-------------|------------------|----------------|----------------|---------------------------------|-------------|---------------------|-------------|-------------|
|             |                  | Salivation     | PRONE position | Decrease of Locomotive Activity | Loss of Fur | Bite/Scratch Wounds | Lacrimation | Closed Eyes |
| 0           | 0/3 <sup>1</sup> | 0/3            | 0/3            | 0/3                             | 0/3         | 0/3                 | 0/3         | 0/3         |
| 500         | 0/3              | 0/3            | 0/3            | 0/3                             | 0/3         | 0/3                 | 0/3         | 0/3         |
| 1000        | 0/3              | 0/3            | 0/3            | 0/3                             | 0/3         | 0/3                 | 0/3         | 0/3         |
| 1500        | 0/3              | 0/3            | 0/3            | 0/3                             | 0/3         | 0/3                 | 0/3         | 0/3         |

<sup>1</sup> Total number of rats treated.

**Figure S1.** Strategy for the site-directed mutagenesis (SDM) of pRTL2 vector sequences to insert *Aspergillus nidulans phy* gene. **(a)** Gene expression cassette in the pRTL2 vector contains 35S promoter, TEV leader sequence, *Nco*I site for the cloning and terminator. AT nucleotides in *Nco*I site were modified into GC nucleotides by SDM-PCR, changing to *Sac*II site; **(b)** *Aspergillus nidulans phy* gene was cloned into mutagenized pRTL2-MS vector, resulting in pRTL2-MS-Phytase. The resultant vector was used as a template to perform the secondary SDM-PCR to recover the start codon of *phy* gene, changing from *Sac*II to *Nco*I site; **(c)** *Phy* gene contains three *Nco*I sites.

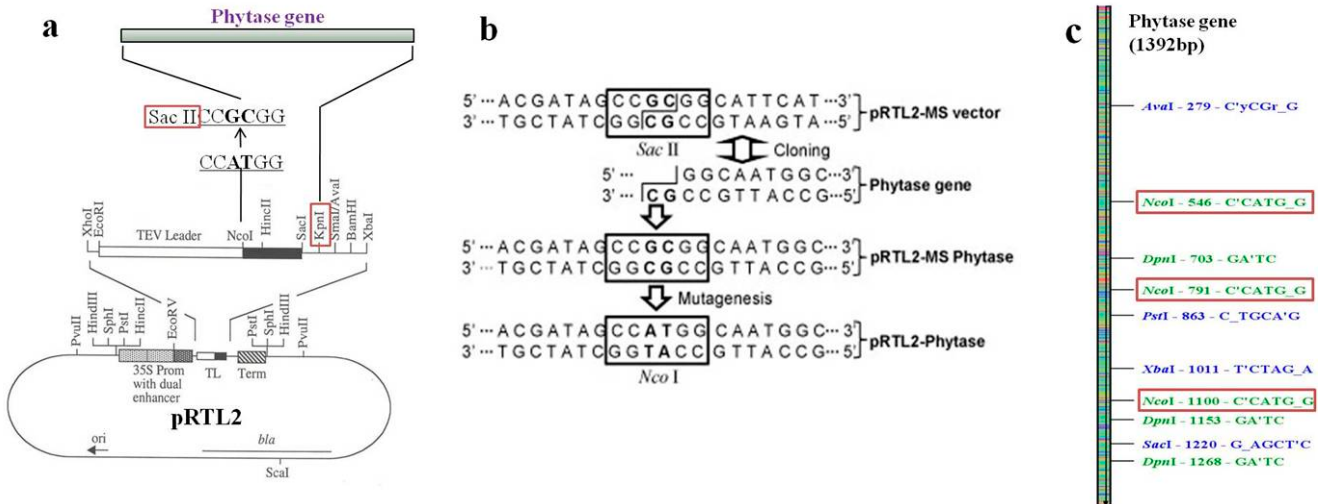

Supplement: Supplementary File 1 [file ijms-15-15571-s001.pdf]
